# Supplementary material for: Mitochondrial genomes of two parasitic Cuscuta species lack clear evidence of horizontal gene transfer and retain unusually fragmented ccmFC genes
Source: PubMed Central journal article supplement (PMC8588681; doi:10.1186/s12864-021-08105-z), 2021-11-12
Supplement: 12864_2021_8105_MOESM4_ESM.pdf [file 12864_2021_8105_MOESM4_ESM.pdf]

## Additional file 4: supplementary Tables S3 and S4

Mitochondrial genomes of two parasitic *Cuscuta* species lack clear evidence of horizontal gene transfer and retain unusually fragmented *ccmF<sub>C</sub>* genes

Anderson, Benjamin M; Krause, Kirsten; and Petersen, Gitte

Table S3. Reference plastomes used for annotation and BLASTN searches and their GenBank accession numbers.

| Order        | Family         | Genus        | Specific_ep | Accession number |
|--------------|----------------|--------------|-------------|------------------|
| Asterales    | Asteraceae     | Helianthus   | annuus      | NC_007977.1      |
| Boraginales  | Lennoaceae     | Pholisma     | arenarium   | NC_039719.1      |
| Cucurbitales | Cucurbitaceae  | Cucurbita    | pepo        | NC_038229.1      |
| Ericales     | Theaceae       | Camellia     | petelotii   | NC_024661.       |
| Fabales      | Fabaceae       | Glycine      | max         | NC_007942.1      |
| Lamiales     | Lamiaceae      | Ocimum       | basilicum   | NC_035143.1      |
| Magnoliales  | Magnoliaceae   | Liriodendron | tulipifera  | NC_008326.1      |
| Malvales     | Malvaceae      | Gossypium    | barbadense  | NC_008641.1      |
| Poales       | Poaceae        | Oryza        | sativa      | NC_008155.1      |
| Proteales    | Nelumbonaceae  | Nelumbo      | nucifera    | NC_025339.1      |
| Santalales   | Schoepfiaceae  | Schoepfia    | jasminodora | NC_034228.1      |
| Solanales    | Convolvulaceae | Cuscuta      | exaltata    | NC_009963.1      |
| Solanales    | Convolvulaceae | Cuscuta      | obtusiflora | NC_009949.1      |
| Vitales      | Vitaceae       | Vitis        | vinifera    | NC_007957.1      |

Table S4. Reference mitogenomes used for annotation, BLASTN searches and phylogenetic analysis and their GenBank accession numbers.

| Order            | Family           | Genus          | Specific_ep  | Accession number |
|------------------|------------------|----------------|--------------|------------------|
| Alismatales      | Araceae          | Spirodela      | polyrhiza    | NC_017840.1      |
| Alismatales      | Butomaceae       | Butomus        | umbellatus   | NC_021399.1      |
| Alismatales      | Hydrocharitaceae | Stratiotes     | aloides      | NC_035317.1      |
| Alismatales      | Zosteraceae      | Zostera        | marina       | NC_035345.1      |
| Amborellales     | Amborellaceae    | Amborella      | trichopoda   | KF754799.1–803.1 |
| Apiales          | Apiaceae         | Bupleurum      | falcatum     | NC_035962.1      |
| Apiales          | Apiaceae         | Daucus         | carota       | NC_017855.1      |
| Aquifoliales     | Aquifoliaceae    | Ilex           | pubescens    | NC_045078.1      |
| Arecales         | Arecaceae        | Cocos          | nucifera     | NC_031696.1      |
| Arecales         | Arecaceae        | Phoenix        | dactylifera  | NC_016740.1      |
| Asparagales      | Amaryllidaceae   | Allium         | cepa         | NC_030100.1      |
| Asparagales      | Orchidaceae      | Gastrodia      | elata        | MF070084.1–102.1 |
| Asterales        | Asteraceae       | Chrysanthemum  | boreale      | NC_039757.1      |
| Asterales        | Asteraceae       | Diplostephium  | hartwegii    | NC_034354.1      |
| Asterales        | Asteraceae       | Helianthus     | annuus       | NC_023337.1      |
| Asterales        | Asteraceae       | Lactuca        | saligna      | NC_042406.1      |
| Asterales        | Asteraceae       | Lactuca        | sativa       | NC_042756.1      |
| Asterales        | Asteraceae       | Lactuca        | serriola     | NC_042378.1      |
| Asterales        | Asteraceae       | Paraprenanthes | diversifolia | MN661146.1       |
| Asterales        | Campanulaceae    | Codonopsis     | lanceolata   | NC_037949.1      |
| Asterales        | Campanulaceae    | Platycodon     | grandiflorus | NC_035958.1      |
| Austrobaileyales | Schisandraceae   | Schisandra     | sphenanthera | NC_042758.1      |
| Brassicales      | Bataceae         | Batis          | maritima     | NC_024429.1      |
| Brassicales      | Brassicaceae     | Arabidopsis    | thaliana     | NC_037304.1      |
| Brassicales      | Brassicaceae     | Arabis         | alpina       | NC_037070.1      |
| Brassicales      | Brassicaceae     | Boechera       | stricta      | NC_042143.1      |
| Brassicales      | Brassicaceae     | Brassica       | carinata     | NC_016120.1      |
| Brassicales      | Brassicaceae     | Brassica       | juncea       | NC_016123.1      |
| Brassicales      | Brassicaceae     | Brassica       | napus        | NC_008285.1      |
| Brassicales      | Brassicaceae     | Brassica       | nigra        | NC_029182.1      |
| Brassicales      | Brassicaceae     | Brassica       | oleracea     | NC_016118.1      |
| Brassicales      | Brassicaceae     | Brassica       | oxyrrhina    | AP018041.1       |
| Brassicales      | Brassicaceae     | Brassica       | rapa         | NC_016125.1      |
| Brassicales      | Brassicaceae     | Capsella       | rubella      | NC_042883.1      |
| Brassicales      | Brassicaceae     | Eruca          | vesicaria    | KF442616.1       |
| Brassicales      | Brassicaceae     | Raphanus       | sativus      | NC_018551.1      |

Table S4 continued.

| Order          | Family          | Genus          | Specific_ep    | Accession number |
|----------------|-----------------|----------------|----------------|------------------|
| Brassicales    | Brassicaceae    | Schrenkiella   | parvula        | KT988071.2       |
| Brassicales    | Brassicaceae    | Sinapis        | arvensis       | NC_031896.1      |
| Brassicales    | Brassicaceae    | Turritis       | glabra         | LC325489.1       |
| Brassicales    | Caricaceae      | Carica         | papaya         | NC_012116.1      |
| Caryophyllales | Aizoaceae       | Sesuvium       | portulacastrum | MN683736.1       |
| Caryophyllales | Caryophyllaceae | Silene         | conica         | JF750490.1–629.1 |
| Caryophyllales | Caryophyllaceae | Silene         | latifolia      | NC_014487.1      |
| Caryophyllales | Caryophyllaceae | Silene         | noctiflora     | JF750431.1–489.1 |
| Caryophyllales | Caryophyllaceae | Silene         | vulgaris       | JF750427.1–30.1  |
| Caryophyllales | Chenopodiaceae  | Beta           | macrocarpa     | NC_015994.1      |
| Caryophyllales | Chenopodiaceae  | Beta           | vulgaris       | NC_002511.2      |
| Caryophyllales | Chenopodiaceae  | Chenopodium    | quinoa         | NC_041093.1      |
| Caryophyllales | Chenopodiaceae  | Spinacia       | oleracea       | NC_035618.1      |
| Caryophyllales | Nepenthaceae    | Nepenthes      | ventricosa     | NC_039531.1      |
| Caryophyllales | Polygonaceae    | Fallopia       | multiflora     | MF611850.1–1.1   |
| Cucurbitales   | Cucurbitaceae   | Citrullus      | lanatus        | NC_014043.1      |
| Cucurbitales   | Cucurbitaceae   | Cucumis        | melo           | MG947207.1–9.1   |
| Cucurbitales   | Cucurbitaceae   | Cucumis        | sativus        | NC_016004.1–6.1  |
| Cucurbitales   | Cucurbitaceae   | Cucurbita      | pepo           | NC_014050.1      |
| Cycadales      | Cycadaceae      | Cycas          | taitungensis   | NC_010303.1      |
| Ericales       | Ericaceae       | Monotropa      | hypopitys      | MK990822.1–3.1   |
| Ericales       | Ericaceae       | Vaccinium      | macrocarpon    | NC_023338.1      |
| Ericales       | Theaceae        | Camellia       | sinensis       | NC_043914.1      |
| Fabales        | Fabaceae        | Acacia         | ligulata       | NC_040998.1      |
| Fabales        | Fabaceae        | Ammopiptanthus | mongolicus     | NC_039660.1      |
| Fabales        | Fabaceae        | Ammopiptanthus | nanus          | MH127920.1       |
| Fabales        | Fabaceae        | Castanospermum | australe       | MK426679.1       |
| Fabales        | Fabaceae        | Cercis         | canadensis     | MN017226.1       |
| Fabales        | Fabaceae        | Glycine        | max            | NC_020455.1      |
| Fabales        | Fabaceae        | Glycine        | soja           | NC_039768.1      |
| Fabales        | Fabaceae        | Haematoxylum   | brasiletto     | NC_045040.1      |
| Fabales        | Fabaceae        | Leucaena       | trichandra     | NC_039738.1      |
| Fabales        | Fabaceae        | Libidibia      | coriaria       | NC_045039.1      |
| Fabales        | Fabaceae        | Lotus          | japonicus      | NC_016743.2      |
| Fabales        | Fabaceae        | Medicago       | truncatula     | NC_029641.1      |
| Fabales        | Fabaceae        | Milletia       | pinnata        | NC_016742.1      |
| Fabales        | Fabaceae        | Phaseolus      | vulgaris       | NC_045135.1      |
| Fabales        | Fabaceae        | Senna          | occidentalis   | NC_038221.1      |

Table S4 continued.

| Order        | Family           | Genus         | Specific_ep  | Accession number |
|--------------|------------------|---------------|--------------|------------------|
| Fabales      | Fabaceae         | Senna         | tora         | NC_038053.1      |
| Fabales      | Fabaceae         | Sophora       | flavescens   | NC_043897.1      |
| Fabales      | Fabaceae         | Styphnolobium | japonicum    | NC_039596.1      |
| Fabales      | Fabaceae         | Tamarindus    | indica       | NC_045038.1      |
| Fabales      | Fabaceae         | Vicia         | faba         | KC189947.1       |
| Fabales      | Fabaceae         | Vigna         | angularis    | NC_021092.1      |
| Fabales      | Fabaceae         | Vigna         | radiata      | NC_015121.1      |
| Fabales      | Polygalaceae     | Epirixanthes  | elongata     | MG783394.1       |
| Gentianales  | Apocynaceae      | Asclepias     | syriaca      | NC_022796.1      |
| Gentianales  | Apocynaceae      | Cynanchum     | wilfordii    | MF611847.1–9.1   |
| Gentianales  | Apocynaceae      | Rhazya        | stricta      | NC_024293.1      |
| Geraniales   | Geraniaceae      | Geranium      | maderense    | NC_027000.1      |
| Ginkgoales   | Ginkgoaceae      | Ginkgo        | biloba       | NC_027976.1      |
| Lamiales     | Gesneriaceae     | Boea          | hygrometrica | NC_016741.1      |
| Lamiales     | Gesneriaceae     | Haberlea      | rhodopensis  | MH757117.1       |
| Lamiales     | Lamiaceae        | Ajuga         | reptans      | NC_023103.1      |
| Lamiales     | Lamiaceae        | Salvia        | miltiorrhiza | NC_023209.1      |
| Lamiales     | Lentibulariaceae | Utricularia   | reniformis   | NC_034982.1      |
| Lamiales     | Oleaceae         | Chionanthus   | rupicola     | MG372115.1       |
| Lamiales     | Oleaceae         | Hesperelaea   | palmeri      | NC_031323.1      |
| Lamiales     | Oleaceae         | Ligustrum     | quihoui      | MN723864.1       |
| Lamiales     | Oleaceae         | Olea          | europaea     | MG372117.1       |
| Lamiales     | Orobanchaceae    | Castilleja    | paramensis   | NC_031806.1      |
| Lamiales     | Phrymaceae       | Mimulus       | guttatus     | NC_018041.1      |
| Magnoliales  | Magnoliaceae     | Liriodendron  | tulipifera   | NC_021152.1      |
| Malpighiales | Euphorbiaceae    | Hevea         | brasiliensis | AP014526.1       |
| Malpighiales | Euphorbiaceae    | Manihot       | esculenta    | NC_045136.1      |
| Malpighiales | Euphorbiaceae    | Ricinus       | communis     | NC_015141.1      |
| Malpighiales | Salicaceae       | Populus       | alba         | NC_041085.1      |
| Malpighiales | Salicaceae       | Populus       | davidiana    | NC_035157.1      |
| Malpighiales | Salicaceae       | Populus       | tremula      | NC_028096.1      |
| Malpighiales | Salicaceae       | Salix         | purpurea     | NC_029693.1      |
| Malpighiales | Salicaceae       | Salix         | suchowensis  | NC_029317.1      |
| Malvales     | Malvaceae        | Bombax        | ceiba        | NC_038052.1      |
| Malvales     | Malvaceae        | Corchorus     | capsularis   | NC_031359.1      |
| Malvales     | Malvaceae        | Corchorus     | olitorius    | NC_031360.1      |
| Malvales     | Malvaceae        | Gossypium     | arboreum     | NC_035073.1      |

Table S4 continued.

| Order       | Family        | Genus         | Specific_ep | Accession number |
|-------------|---------------|---------------|-------------|------------------|
| Malvales    | Malvaceae     | Gossypium     | barbadense  | NC_028254.1      |
| Malvales    | Malvaceae     | Gossypium     | davidsonii  | NC_035075.1      |
| Malvales    | Malvaceae     | Gossypium     | harknessii  | NC_027407.1      |
| Malvales    | Malvaceae     | Gossypium     | hirsutum    | NC_027406.1      |
| Malvales    | Malvaceae     | Gossypium     | raimondii   | NC_029998.1      |
| Malvales    | Malvaceae     | Gossypium     | thurberi    | NC_035074.1      |
| Malvales    | Malvaceae     | Gossypium     | trilobum    | NC_035076.1      |
| Malvales    | Malvaceae     | Hibiscus      | cannabinus  | NC_035549.1      |
| Myrtales    | Lythraceae    | Lagerstroemia | indica      | NC_035616.1      |
| Myrtales    | Myrtaceae     | Eucalyptus    | grandis     | NC_040010.1      |
| Nymphaeales | Nymphaeaceae  | Nymphaea      | colorata    | NC_037468.1      |
| Pinales     | Pinaceae      | Pinus         | Taeda       | NC_039746.1      |
| Poales      | Poaceae       | Aegilops      | speltoides  | NC_022666.1      |
| Poales      | Poaceae       | Bambusa       | oldhamii    | EU365401.1       |
| Poales      | Poaceae       | Cynodon       | dactylon    | MK175054.1       |
| Poales      | Poaceae       | Eleusine      | indica      | NC_040989.1      |
| Poales      | Poaceae       | Hordeum       | vulgare     | MN127975.1       |
| Poales      | Poaceae       | Lolium        | perenne     | JX999996.1       |
| Poales      | Poaceae       | Oryza         | coarctata   | MG429050.1       |
| Poales      | Poaceae       | Oryza         | minuta      | NC_029816.1      |
| Poales      | Poaceae       | Oryza         | rufipogon   | NC_013816.1      |
| Poales      | Poaceae       | Oryza         | sativa      | NC_007886.1      |
| Poales      | Poaceae       | Saccharum     | officinatum | LC107874.1-5.1   |
| Poales      | Poaceae       | Sorghum       | bicolor     | NC_008360.1      |
| Poales      | Poaceae       | Tripsacum     | dactyloides | NC_008362.1      |
| Poales      | Poaceae       | Triticum      | aestivum    | NC_036024.1      |
| Poales      | Poaceae       | Triticum      | timopheevii | NC_022714.1      |
| Poales      | Poaceae       | Zea           | luxurians   | NC_008333.1      |
| Poales      | Poaceae       | Zea           | mays        | NC_007982.1      |
| Poales      | Poaceae       | Zea           | perennis    | NC_008331.1      |
| Proteales   | Nelumbonaceae | Nelumbo       | nucifera    | NC_030753.1      |
| Rosales     | Cannabaceae   | Cannabis      | sativa      | NC_029855.1      |
| Rosales     | Moraceae      | Morus         | notabilis   | NC_041177.1      |
| Rosales     | Rhamnaceae    | Ziziphus      | jujuba      | NC_029809.1      |
| Rosales     | Rosaceae      | Eriobotrya    | japonica    | NC_045228.1      |
| Rosales     | Rosaceae      | Malus         | hupehensis  | KR534606.1       |
| Rosales     | Rosaceae      | Malus         | x-domestica | NC_018554.1      |

Table S4 continued.

| Order          | Family          | Genus        | Specific_ep   | Accession number            |
|----------------|-----------------|--------------|---------------|-----------------------------|
| Rosales        | Rosaceae        | Prunus       | avium         | NC_044768.1                 |
| Rosales        | Ulmaceae        | Hemiptelea   | dauidii       | MN061667.1                  |
| Santalales     | Balanophoraceae | Lophophytum  | mirabile      | KU992322.1–80.1; KX792461.1 |
| Santalales     | Viscaceae       | Viscum       | album         | NC_029039.1                 |
| Santalales     | Viscaceae       | Viscum       | scurruloideum | KT022222.1–3.1              |
| Sapindales     | Anacardiaceae   | Spondias     | mombin        | NC_045035.1                 |
| Sapindales     | Anacardiaceae   | Spondias     | tuberosa      | NC_045036.1                 |
| Sapindales     | Nitrariaceae    | Peganum      | harmala       | MK431826.1                  |
| Sapindales     | Rutaceae        | Citrus       | sinensis      | NC_037463.1                 |
| Sapindales     | Sapindaceae     | Xanthoceras  | sorbifolium   | MK333231.1                  |
| Saxifragales   | Cynomoriaceae   | Cynomorium   | coccineum     | KX270753.1–801.1            |
| Solanales      | Convolvulaceae  | Ipomoea      | nil           | NC_031158.1                 |
| Solanales      | Solanaceae      | Capsicum     | annuum        | NC_024624.1                 |
| Solanales      | Solanaceae      | Hyoscyamus   | niger         | NC_026515.1                 |
| Solanales      | Solanaceae      | Nicotiana    | attenuata     | NC_036467.1                 |
| Solanales      | Solanaceae      | Nicotiana    | sylvestris    | NC_029805.1                 |
| Solanales      | Solanaceae      | Nicotiana    | tabacum       | NC_006581.1                 |
| Solanales      | Solanaceae      | Physochlaina | orientalis    | NC_044153.1                 |
| Solanales      | Solanaceae      | Solanum      | commersonii   | MF989960.1–1.1              |
| Solanales      | Solanaceae      | Solanum      | lycopersicum  | NC_035963.1                 |
| Solanales      | Solanaceae      | Solanum      | pennellii     | NC_035964.1                 |
| Solanales      | Solanaceae      | Solanum      | tuberosum     | MN104801.1–3.1              |
| Vitales        | Vitaceae        | Vitis        | vinifera      | NC_012119.1                 |
| Welwitschiales | Welwitschiaceae | Welwitschia  | mirabilis     | NC_029130.1                 |
